# Supplementary material for: Probing the electrochemical properties of an electrophoretically deposited Co3O4/rGO/CNTs nanocomposite for supercapacitor applications
Source: Royal Society of Chemistry journal article supplement (doi:10.1039/c6ra11399k), 2016-01-01
Supplement: c6ra11399k1.pdf [file c6ra11399k1.pdf]

**†Electronic Supplementary Information (ESI)**

**Probing the Electrochemical Properties of Electrophoretically Deposited  $\text{Co}_3\text{O}_4/\text{rGO}/\text{CNT}$  Nanocomposite for Supercapacitor Applications**

Nagesh Kumar<sup>a</sup>, Chun-Wei Huang<sup>b</sup>, Po-Jen Yen<sup>b</sup>, Wen-Wei Wu<sup>b</sup>, Kung-Hwa Wei<sup>b</sup>, Tseung Yuen Tseng<sup>a\*</sup>

<sup>a</sup>Department of Electronics Engineering and Institute of Electronics, National Chiao Tung University, Hsinchu 300, Taiwan

<sup>b</sup>Department of Materials Science and Engineering, National Chiao Tung University, Hsinchu 300, Taiwan

\*Corresponding authors. Tel: 886-3-5731879; Email: [tseng@cc.nctu.edu.tw](mailto:tseng@cc.nctu.edu.tw) (T.Y.Tseng)

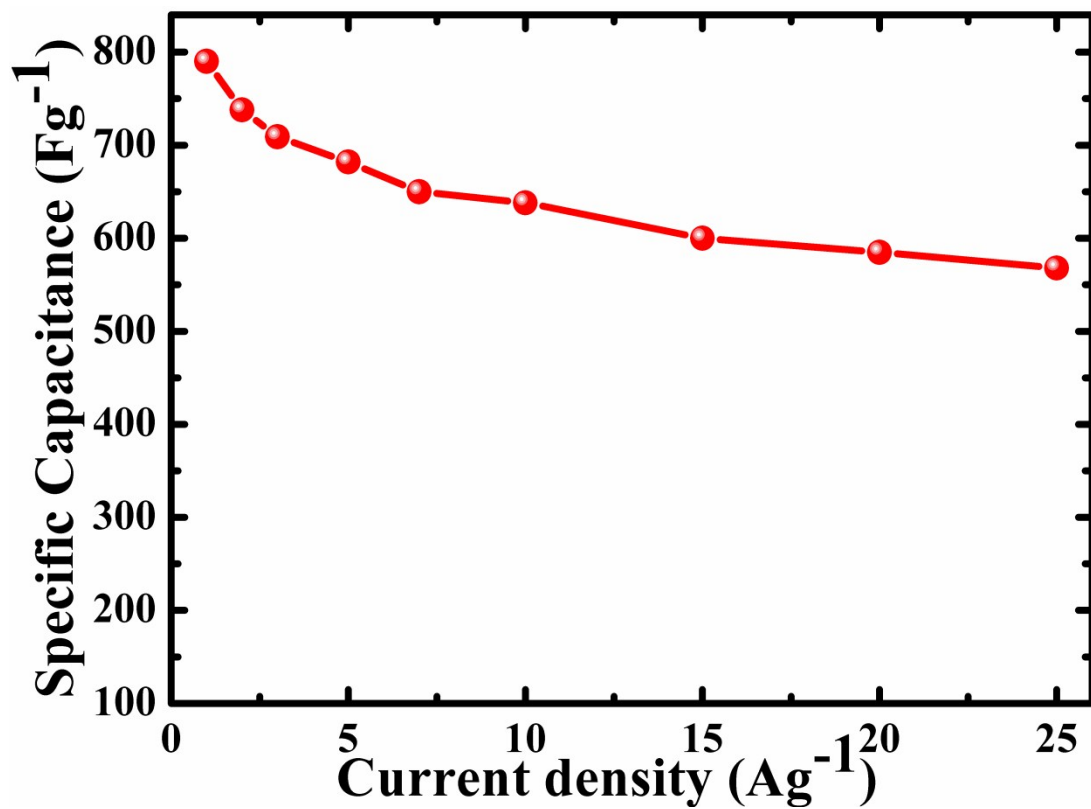

**Figure S1.** The specific capacitances, calculated from GCD curves at different current density values for 2GCoC composite.

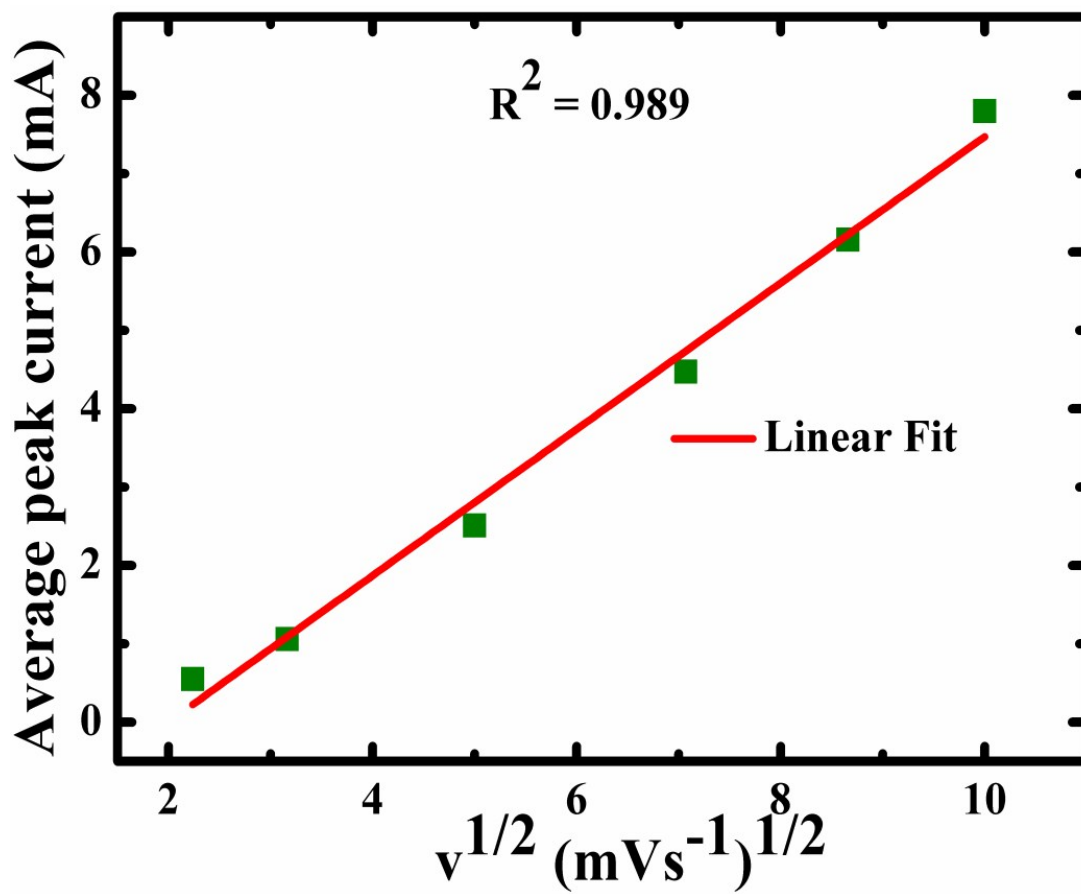

**Figure S2.** The square root of scan rate ( $v$ ) as a function of average peak current for designed asymmetric supercapacitor in 1 M KOH electrolyte.

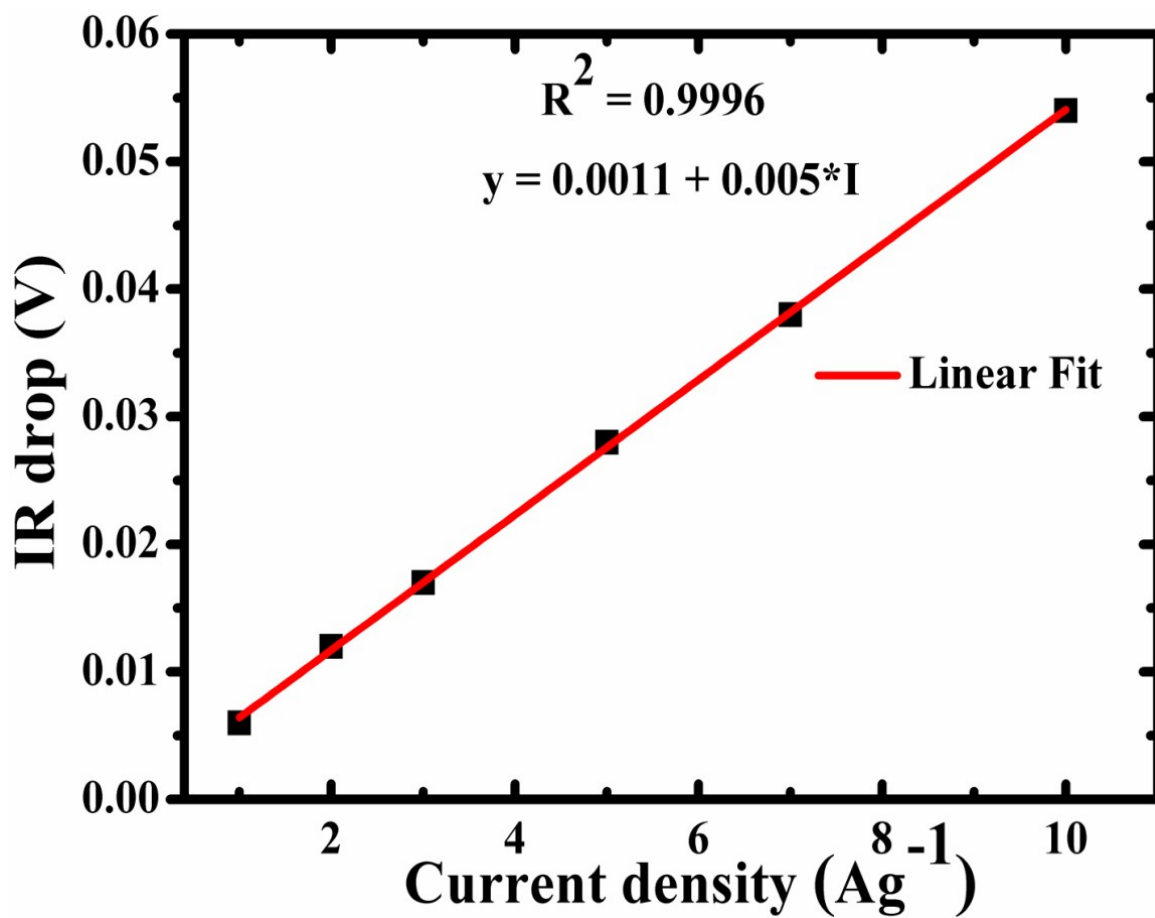

**Figure S3.** The IR drops as a function of current density for asymmetric supercapacitor in 1 M KOH electrolyte.

**Table S1.** Electrochemical performance of Co<sub>3</sub>O<sub>4</sub>/rGO/CNTs nanocomposites in this study, compared with some other Co<sub>3</sub>O<sub>4</sub>/ rGO nanocomposites reported in previous literature.

| <b>Material</b>                                                            | <b>Specific capacitance (Fg<sup>-1</sup>)</b>  | <b>Electrolyte</b> | <b>Capacitance Retention</b> | <b>Ref.</b>         |
|----------------------------------------------------------------------------|------------------------------------------------|--------------------|------------------------------|---------------------|
| Co <sub>3</sub> O <sub>4</sub> nanosheet/rGO                               | 396 Fg <sup>-1</sup> (1 Ag <sup>-1</sup> )     | 3 M KOH            | 72.3% after 3000 cycles      | [1]                 |
| Co <sub>3</sub> O <sub>4</sub> microsphere /rGO/CNTs paper                 | 378 Fg <sup>-1</sup> (2 Ag <sup>-1</sup> )     | 3 M KOH            | 96% after 700 cycles         | [2]                 |
| Co <sub>3</sub> O <sub>4</sub> /rGO                                        | 636 Fg <sup>-1</sup> (1 Ag <sup>-1</sup> )     | 6 M KOH            | 97.6% after 1000 cycles      | [3]                 |
| Co <sub>3</sub> O <sub>4</sub> /rGO nanosheet<br>Carbon black              | 341 Fg <sup>-1</sup> (10 mVs <sup>-1</sup> )   | 6 M KOH            | 89% after 1000 cycles        | [4]                 |
| Co <sub>3</sub> O <sub>4</sub> /Mildly oxidized<br>CNT/Mildly oxidized rGO | 492 Fg <sup>-1</sup> (0.1 Ag <sup>-1</sup> )   | 6 M KOH            |                              | [5]                 |
| Co <sub>3</sub> O <sub>4</sub> nanoplate/rGO                               | 338 Fg <sup>-1</sup> (0.2 Ag <sup>-1</sup> )   | 6 M KOH            | 93.2% after 1000 cycles      | [6]                 |
| Carbon nanofiber/Co <sub>3</sub> O <sub>4</sub> -<br>nanoparticles         | 585 Fg <sup>-1</sup> (1 Ag <sup>-1</sup> )     | 6 M KOH            | 74% after 1000 cycles        | [7]                 |
| Co <sub>3</sub> O <sub>4</sub> /rGO<br>composites                          | 438 Fg <sup>-1</sup> (1 Ag <sup>-1</sup> )     | 1M KOH             | 56% after 2000 cycles        | [8]                 |
| Strongly coupled<br>nanosheet/rGO                                          | 187 Fg <sup>-1</sup> (1.2 Ag <sup>-1</sup> )   | 2 M KOH            | 94% after 1000 cycles        | [9]                 |
| Needle-like Co <sub>3</sub> O <sub>4</sub> /rGO                            | 158 Fg <sup>-1</sup> (0.1 Ag <sup>-1</sup> )   | 2 M KOH            | 70% after 4000 cycles        | [10]                |
| 3D rGO hydrogel/Co <sub>3</sub> O <sub>4</sub>                             | 757.5 Fg <sup>-1</sup> (0.5 Ag <sup>-1</sup> ) | 6 M KOH            | 94.5% after 500 cycles       | [11]                |
| Co <sub>3</sub> O <sub>4</sub> /rGO nanosheets                             | 650 Fg <sup>-1</sup> (5 mVs <sup>-1</sup> )    | 1M KOH             | 92% after 1000 cycles        | [12]                |
| Co <sub>3</sub> O <sub>4</sub> /rGO/CNTs composite                         | 790 Fg <sup>-1</sup> (1 Ag <sup>-1</sup> )     | 1M KOH             | 75% after 1000 cycles        | <b>Present work</b> |

## References

- [1] L. Ma, H. Zhou, X. Shen, Q. Chen, G. Zhu and Z. Ji, *RSC Adv.*, 2014, **4**, 53180–53187.
- [2] C. Yuan, L. Yang, L. Hou, J. Li, Y. Sun, X. Zhang, L. Shen, X. Lu, S. Xiong and X. W. (David) Lou, *Adv. Funct. Mater.*, 2012, **22**, 2560–2566.
- [3] L. J. Xie, J. F. Wu, C. M. Chen, C. M. Zhang, L. Wan, J. L. Wang, Q. Q. Kong, C. X. Lv, K. X. Li and G. H. Sun, *J. Power Sources*, 2013, **242**, 148–156.
- [4] S. Park and S. Kim, *Electrochim. Acta*, 2013, **89**, 516–522.
- [5] M. Y. Lv, K. Y. Liu, Y. Li, L. Wei, J. J. Zhong and G. Su, *Bull. Korean Chem. Soc.*, 2014, **35**, 1349–1355.
- [6] L. Wang, D. Wang, J. Zhu and X. Liang, *Ionics*, 2013, **19**, 215–220.
- [7] S. Abouali, M. A. Garakani, B. Zhang, Z. L. Xu, E. K. Heidari, J. Q. Huang, J. Huang and J. K. Kim, *ACS Appl. Mater. Interfaces*, 2015, **7**, 13503–13511.
- [8] Z. Song, Y. Zhang, W. Liu, S. Zhang, G. Liu, H. Chen and J. Qiu, *Electrochim. Acta*, 2013, **112**, 120–126.
- [9] C. Yuan, L. Zhang, L. Hou, G. Pang and W. C. Oh, *RSC Adv.*, 2014, **4**, 14408–14413.
- [10] Q. Guan, J. Cheng, B. Wang, W. Ni, G. Gu, X. Li, L. Huang, G. Yang and F. Nie, *ACS Appl. Mater. Interfaces*, 2014, **6**, 7626–7632.
- [11] J. Yuan, J. Zhu, H. Bi, X. Meng, S. Liang, L. Zhang and X. Wang, *Phys. Chem. Chem. Phys.*, 2013, **15**, 12940–12945.
- [12] A. N. Naveen, P. Manimaran and S. Selladurai, *J Mater Sci: Mater Electron*, 2015, **26**, 8988–9000.
